# Supplementary material
Source: Springer Nature journal article supplement (https://www.springermedizin.de/resource/supplementary/12865_2008_246_MOESM2_ESM.pdf/9427590)

LPS

*Cb**Cb*  
+naïve  
serum*Cb*  
+immune  
serum

CD86

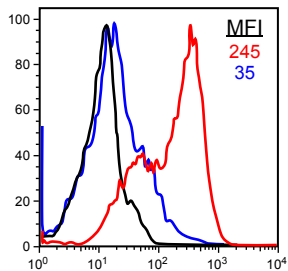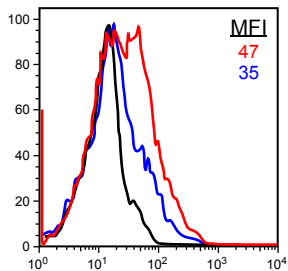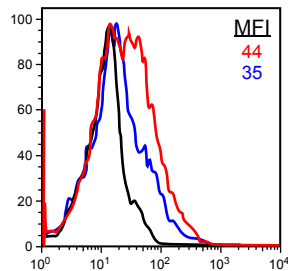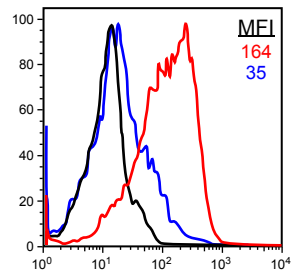

CD80

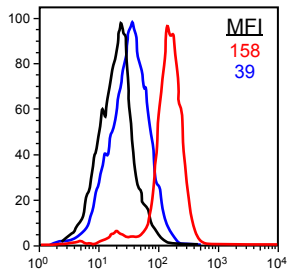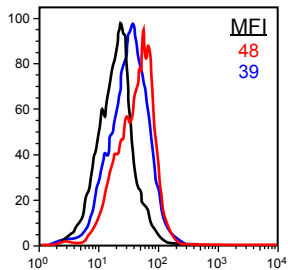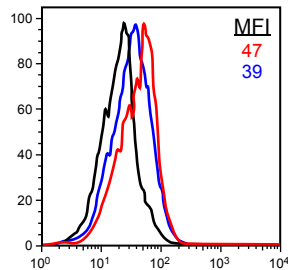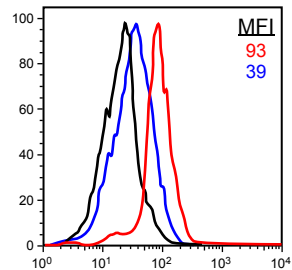

CD83

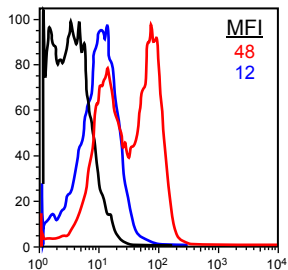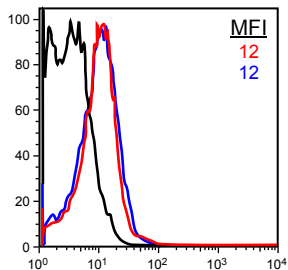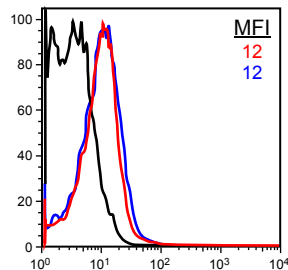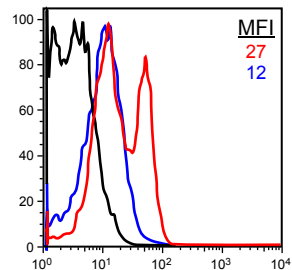

Supplement: MOESM2 [file 9427590]
